# Supplementary figures and images for: Molecular characterisation of malaria and glucose-6-phosphate dehydrogenase deficiency in conflict-affected zones of central and eastern Sudan
Source: Research Square preprint supplement (doi:10.21203/rs.3.rs-8412149/v1), 2026-01-13

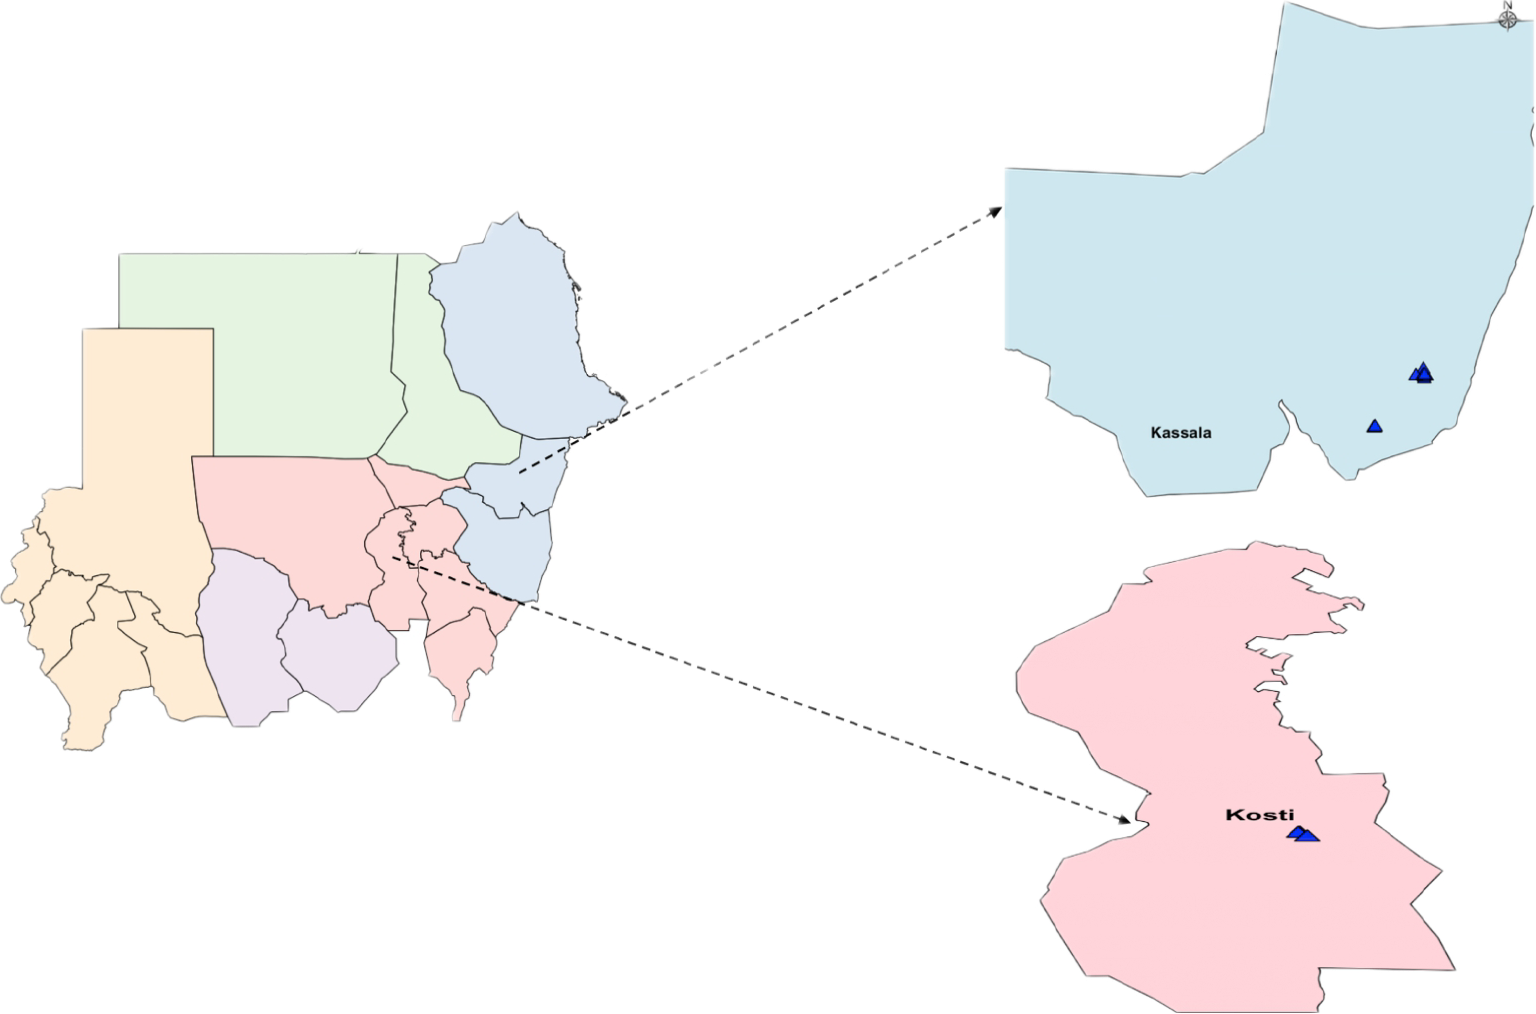


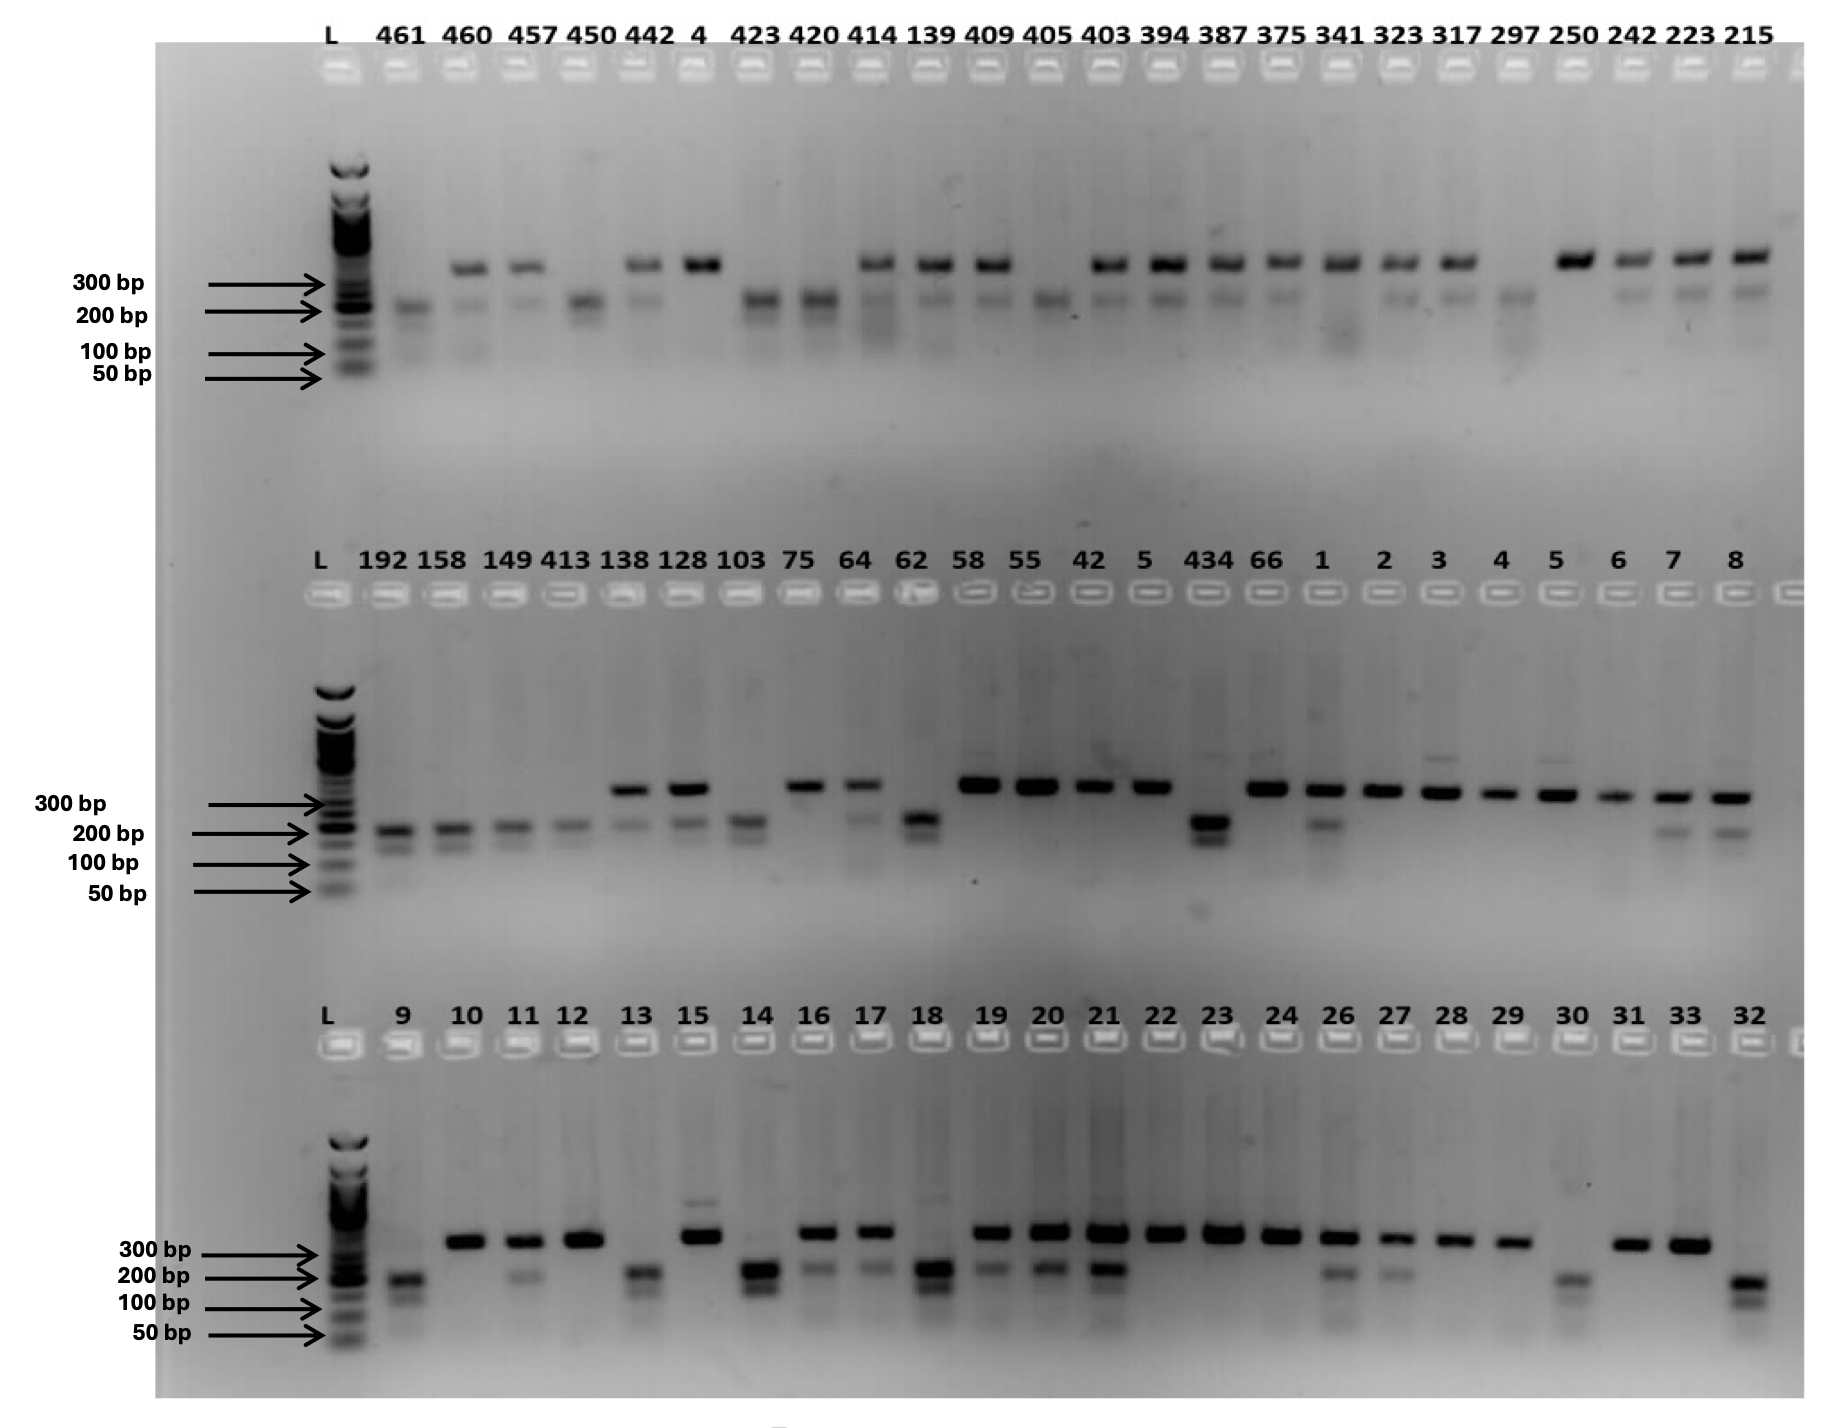


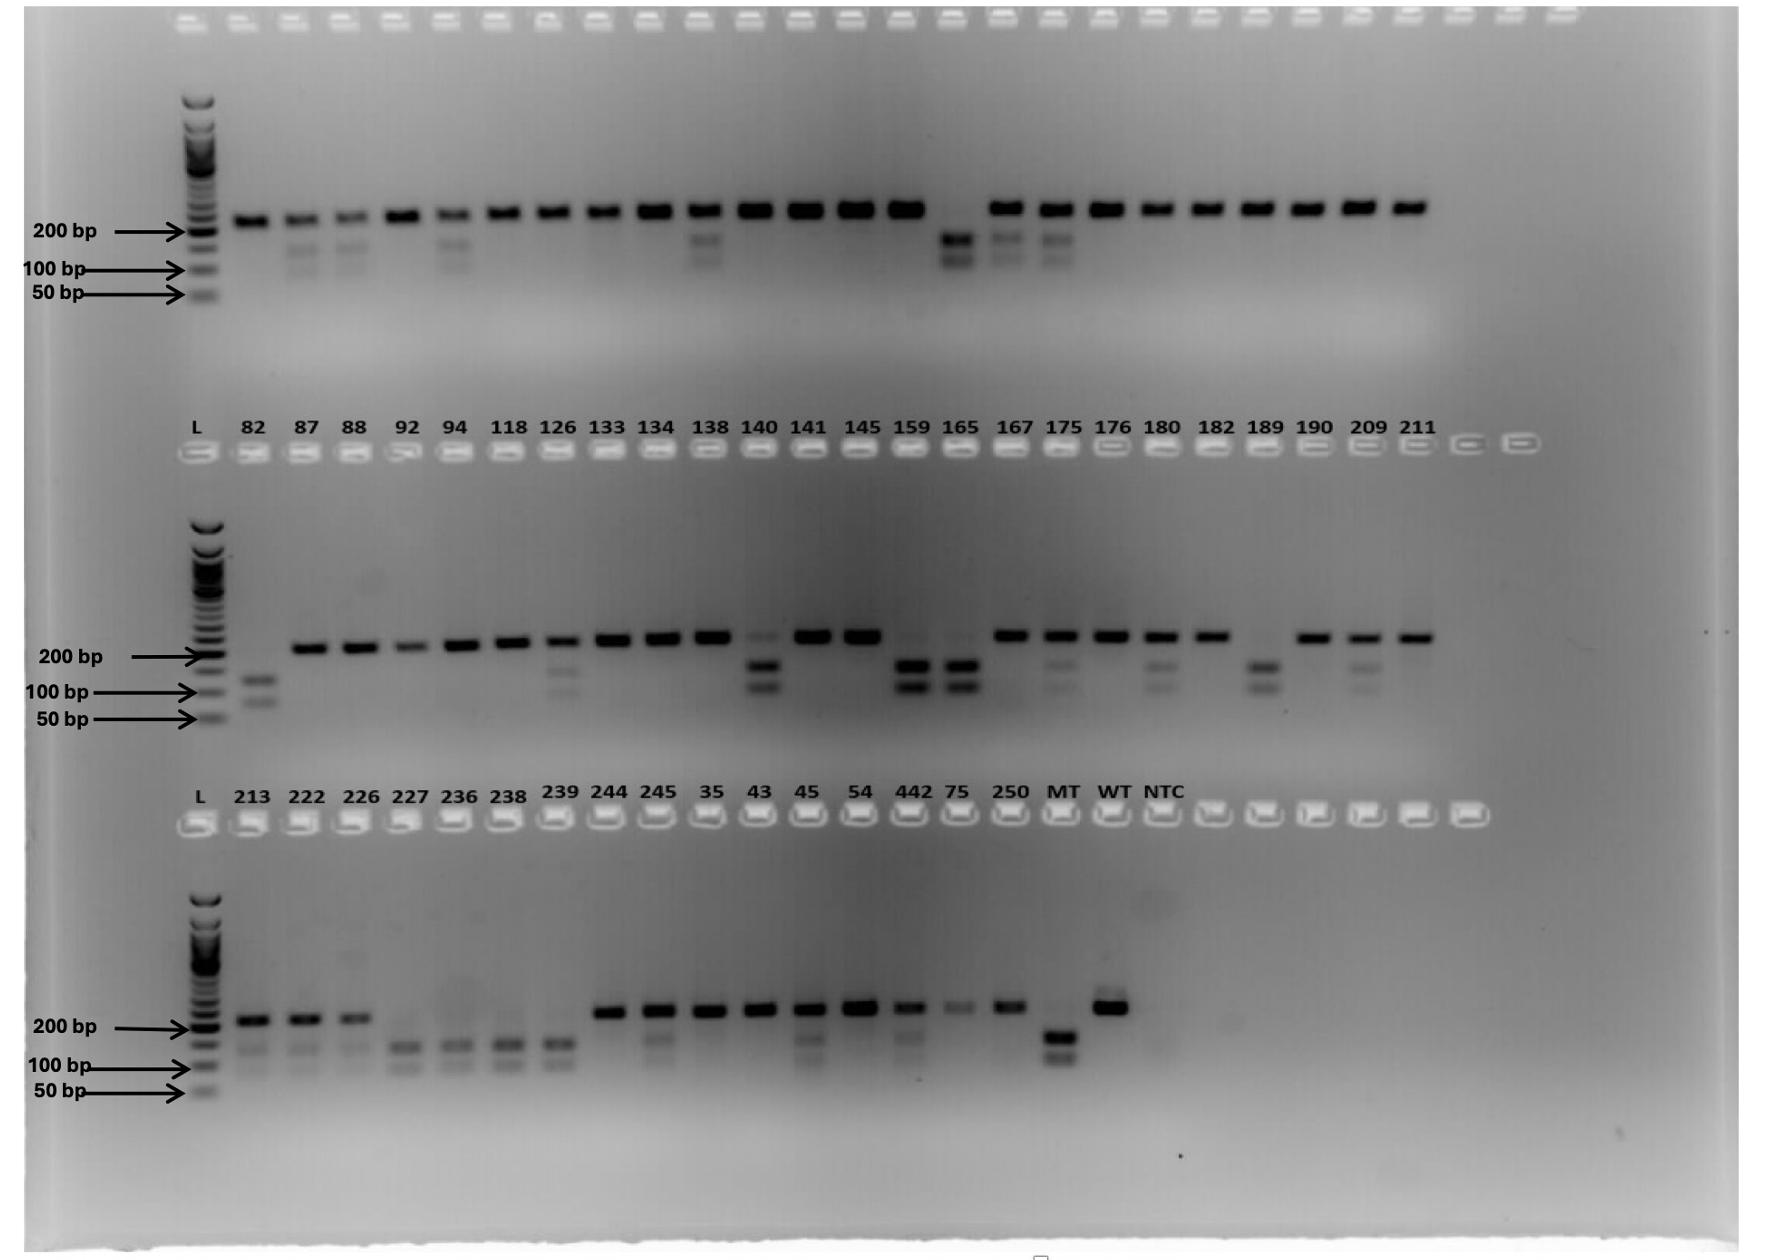

Supplement: Supplementary file 1 [file df669e39db9b0e44328ef8b8.docx]
